# Supplementary material
Source: PubMed Central journal article supplement (PMC5138854)
Supplement: NIHMS833512-supplement-Supporting_Information.pdf [file NIHMS833512-supplement-Supporting_Information.pdf]

**Supporting Information Table 1.** MHC I and II protein processing primers for real-time PCR analysis.

| <b>Gene</b>   | <b>Forward Primer</b>   | <b>Reverse Primer</b>    |
|---------------|-------------------------|--------------------------|
| $\beta$ actin | AGAGGGAAATCGTGCGTGAC    | CACTAGTGATGACCTGGCCGT    |
| $\beta$ 1     | TGACCAAGGACGAATGTCTG    | GATTGGTCTCCAAAAGCA       |
| $\beta$ 2     | CTGTCTTGGAAGCGGATTTC    | GCAACAACCATCCCTTCAGT     |
| $\beta$ 5i    | CAGTCCTGAAGAGGCCTACG    | CCAACCGTCTTCCTTCATGT     |
| MEC-L         | CTTTACTGCCCTTGGCTCTG    | GTGATCACACAGGCATCCAC     |
| CatS          | GCCATTCTCCTTCTTCTTCTACA | CAAGAACACCATGATTCACATTGC |
| H2DM $\alpha$ | TGAAGGTCAAATCCCAGTGTCC  | AGCGGTCAATTCGTGTGTCAC    |
| H2DM $\beta$  | GTCCTCAGTCTGCACTGTATG   | CAGCACCCCAAATTCACAG      |
| TSSP          | GGAGCCACCCAAGTACTGTT    | AGCAGTGGGAAGCACTAGGA     |

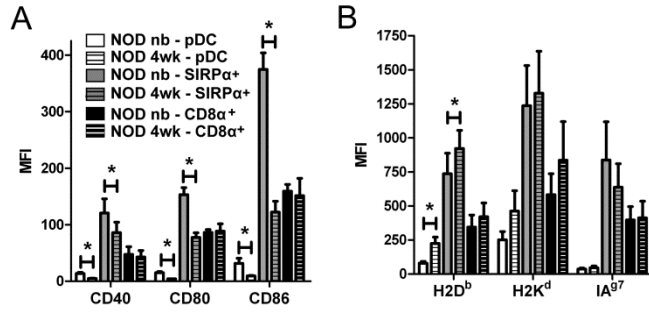

**Supporting Information Fig. 1. The 4 wk-old thymic DC do not exhibit an increased activation profile.** NOD newborn and 4 wk-old thymic DC subsets were assessed via flow cytometry for the level of expression of (A) co-stimulatory or (B) MHC molecules. Data is the average mean fluorescent intensity (MFI) of  $\geq 3$  mice; \* $p < 0.05$  (Student's t-test).

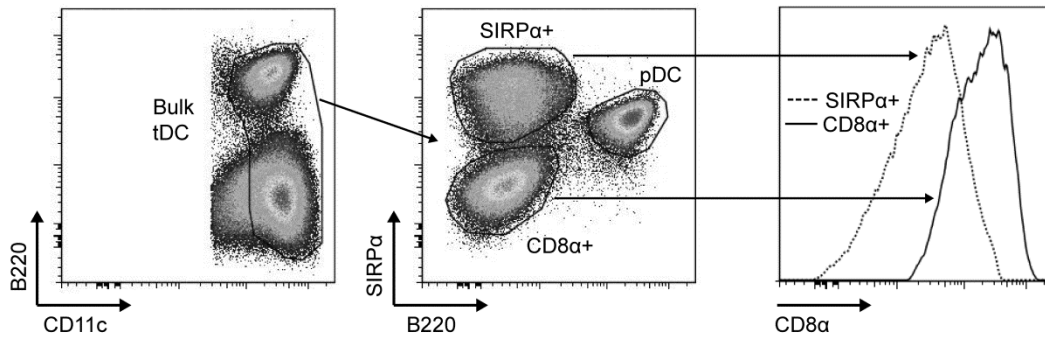

**Supporting Information Fig. 2. The gating strategy utilized to identify the thymic DC subsets.** NOD 4 wk-old thymic DC were enriched using anti-CD11c beads and expression of B220, SIRP $\alpha$ , or CD8 $\alpha$  determined by flow cytometry. The relative expression of CD8 $\alpha$  was compared on B220<sup>-</sup>SIRP $\alpha$ <sup>+</sup> and B220<sup>-</sup>SIRP $\alpha$ <sup>-</sup> DC. pDC are defined as CD11c<sup>int</sup>B220<sup>+</sup>; SIRP $\alpha$ <sup>+</sup> DC as CD11c<sup>hi</sup>SIRP $\alpha$ <sup>+</sup>B220<sup>-</sup>CD8 $\alpha$ <sup>int</sup>, and CD8 $\alpha$ <sup>+</sup> DC as CD11c<sup>hi</sup>SIRP $\alpha$ <sup>-</sup>B220<sup>-</sup>CD8 $\alpha$ <sup>hi</sup>.
